# Supplementary material
Source: PubMed Central journal article supplement (PMC3165060)
Supplement: NIHMS318507-supplement-1_si_001.pdf [file NIHMS318507-supplement-1_si_001.pdf]

Supporting Information for:

Isothermal Discrimination of Single-Nucleotide  
Polymorphisms via Real-Time Kinetic Desorption  
and Label-Free Detection of DNA using Silicon  
Photonic Microring Resonator Arrays

*Abraham J. Qavi,<sup>1</sup> Thomas M. Mysz,<sup>2</sup> Ryan C. Bailey<sup>1,\*</sup>*

Department of Chemistry<sup>1</sup> and Department of Chemical and Biomolecular Engineering,<sup>2</sup>

University of Illinois at Urbana-Champaign, 600 S. Mathews Ave, Illinois, 61801

\* baileyrc@illinois.edu

## Table of Contents

|                                                                                               |    |
|-----------------------------------------------------------------------------------------------|----|
| Chemical and Biochemical Functionalization of Sensor Surfaces .....                           | 3  |
| Figure S1, Addition of HyNic-Silane to sensor surface .....                                   | 3  |
| Figure S2, Addition of S-4FB modified ssDNA capture probes to sensor surface .....            | 4  |
| DNA Detection and Surface Regeneration.....                                                   | 5  |
| Table S1, Probe sequences used in DNA detection and sequence specificity experiments.....     | 5  |
| Figure S3, Regeneration of sensor surfaces.....                                               | 6  |
| Figure S4, Regeneration of sensor surfaces.....                                               | 7  |
| Non-Complementary Sequence Specificity.....                                                   | 8  |
| Figure S5, Sequence specificity of sensors .....                                              | 8  |
| Detection of Single Nucleotide Polymorphisms.....                                             | 9  |
| Table S2, Single-plexed SNP assay probe sequences.....                                        | 9  |
| Multiplexed Detection and Identification of Single Nucleotide Polymorphisms.....              | 10 |
| Table S3, Low G-C content probe sequences.....                                                | 10 |
| Table S4, High G-C content probe sequences.....                                               | 10 |
| Figure S6, Hybridization and desorption responses for 4-plexed SNP assay .....                | 11 |
| Figure S7, Normalized desorption response for 4 x 4 SNP assay .....                           | 12 |
| Determination of DNA Melting Temperatures.....                                                | 13 |
| Figure S8, Melting curves for low G-C content probes .....                                    | 13 |
| Figure S9, Melting curves for high G-C content probes.....                                    | 14 |
| Detection of SNP Heterozygotes.....                                                           | 15 |
| Figure S10, Discrimination of SNPs with heterozygote alleles.....                             | 15 |
| Data Processing.....                                                                          | 16 |
| Table S5, Summary of desorption rates and $T_m$ s for the single-plexed SNP assay .....       | 16 |
| Table S6, Parameters used for Langmuir binding fits to obtain initial slopes.....             | 17 |
| Table S7, Parameters used in linear fits used in obtaining initial slopes .....               | 18 |
| Table S8, Summary of initial slopes used for the calibration curve for DNA detection.....     | 20 |
| Table S9, Fitting parameters used for determining low G-C content probe desorption rates ...  | 21 |
| Table S10, Summary of desorption rates and $T_m$ s of low G-C content probes.....             | 24 |
| Table S11, Fitting parameters used for determining high G-C content probe desorption rates    | 25 |
| Table S12, Summary of the desorption rates and $T_m$ s of high G-C content probes.....        | 28 |
| Table S13, Fitting parameters used for determining heterozygote allele desorption rates ..... | 29 |
| Table S14, Summary of the Desorption Rates in Profiling SNPs with Heterozygote Alleles ..     | 33 |
| References .....                                                                              | 34 |

## Chemical and Biochemical Functionalization of Sensor Surfaces.

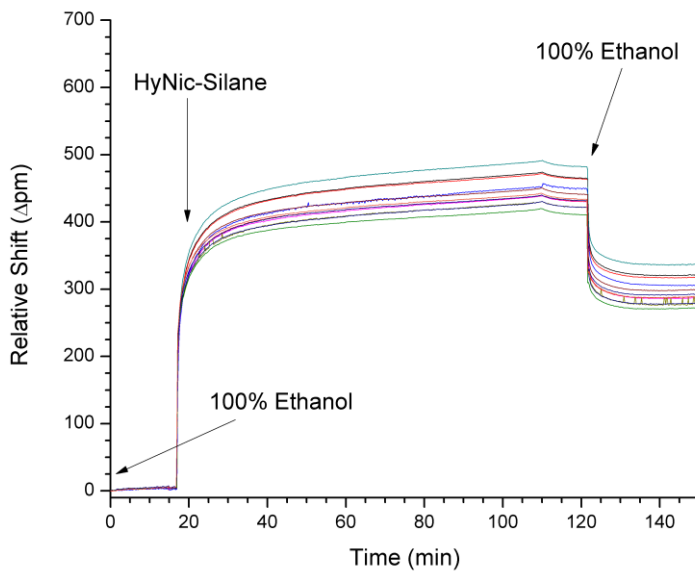

**Figure S1.** Addition of 1 mg/mL HyNic-Silane solution to 12 microring sensors. Each trace represents a different microring sensor. The net shift of  $\sim$ 300 pm after rinsing the surface with 100% ethanol indicates the covalent attachment of the HyNic Silane to the microring surfaces.

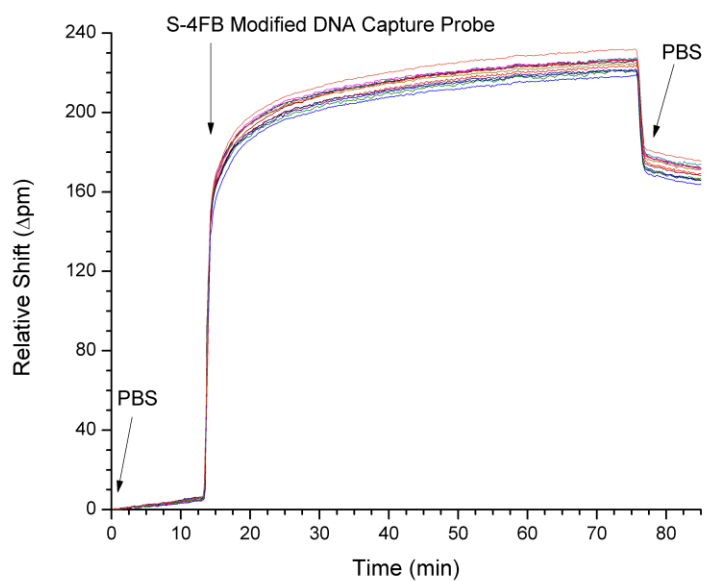

**Figure S2.** Addition of an S-4FB modified ssDNA capture probe to a set of 12 microrings functionalized with a HyNic-Silane layer.

## DNA Detection and Surface Regeneration.

**Table S1.** Probe sequences utilized in DNA detection and repeated regeneration experiments (shown in Figure 1, Figure S3, and Figure S4).

| <b>Strand</b> | <b>Sequence</b>                                                                              |
|---------------|----------------------------------------------------------------------------------------------|
| A             | 5'-NH <sub>2</sub> - (CH <sub>2</sub> ) <sub>12</sub> - GGTAGTACAGCATATTGGAAAGTGTATAAGATT-3' |
| A'            | 3'-TTTCACATATTCTAA-5'                                                                        |
| B             | 5'-NH <sub>2</sub> - (CH <sub>2</sub> ) <sub>12</sub> - AGAATGCAGGGCCTCACGTTACCCTACCACATA-3' |
| B'            | 3'-AATGGGATGGTGTAT-5'                                                                        |

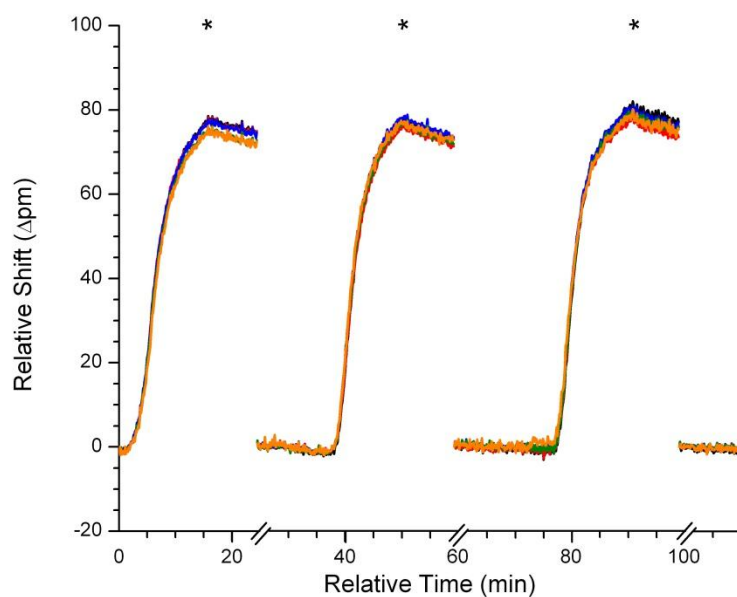

**Figure S3.** Repeated real time shifts in resonance wavelength from 5' ssDNA modified microrings responding to a 1  $\mu$ M complementary target sequence. The surface-bound duplexes were dissociated with 8 M urea to regenerate the surface prior to the next hybridization cycle. For clarity, the regeneration step has been omitted due to a large bulk refractive index shift that goes off scale. Asterisks indicate the time points at which the solution was switched back to pure buffer (no DNA).

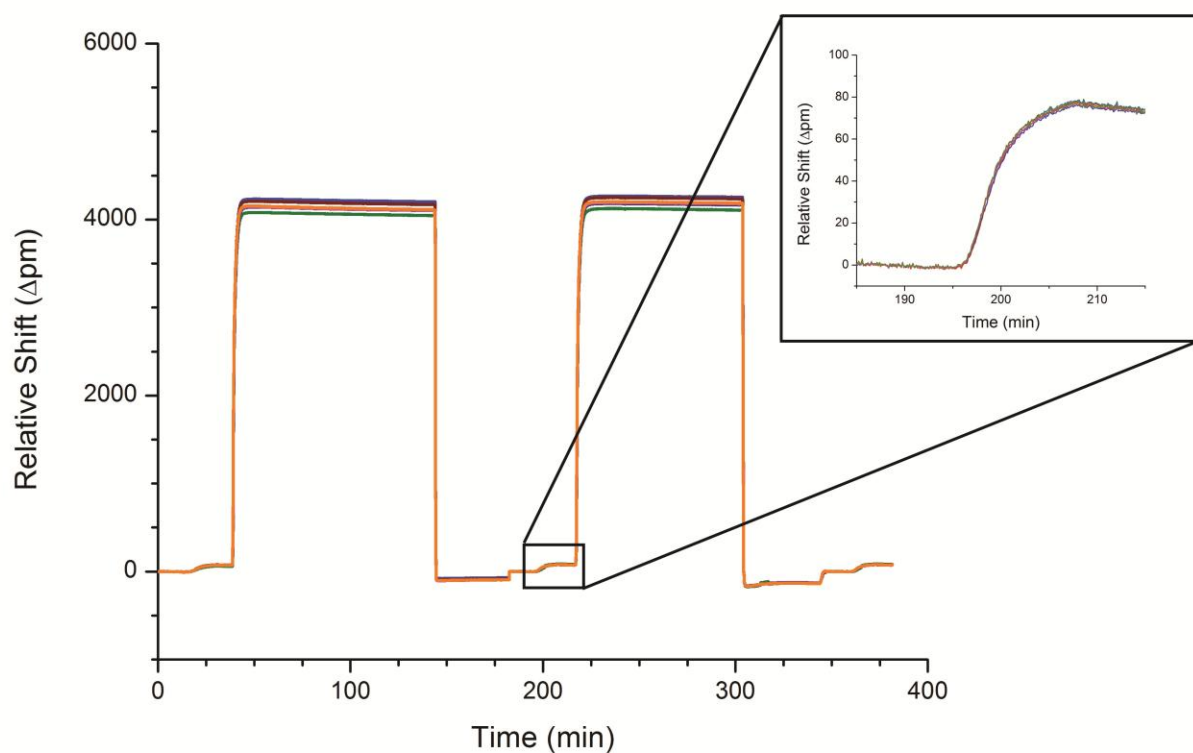

**Figure S4.** Repeated real time shifts in resonance wavelength from 5' ssDNA modified microrings responding to a 1  $\mu\text{M}$  complementary target sequence. The surface-bound duplexes were dissociated with 8 M urea to regenerate the surface prior to the next hybridization cycle. In contrast to Figure S3, the regeneration steps with 8 M Urea (the  $\sim 4000$  pm increases in signal) are included. The inset highlights an individual hybridization event.

## Non-Complementary Sequence Specificity.

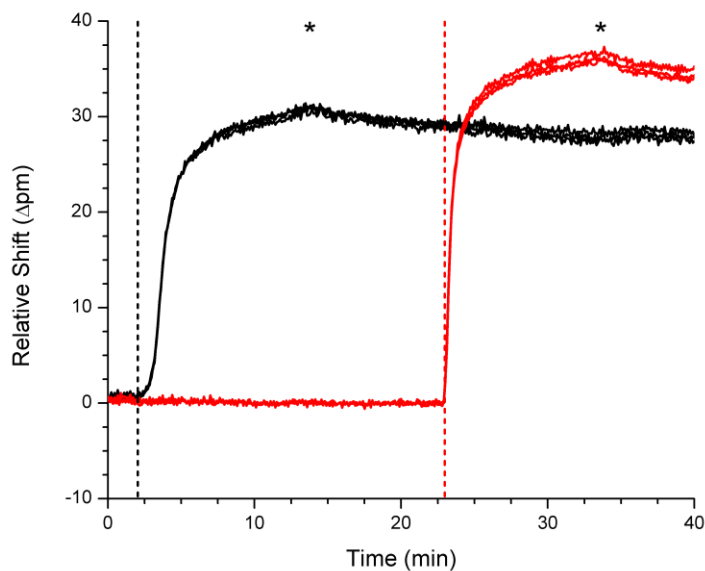

**Figure S5.** Sequence specific response of two sets of microrings (3 per set) functionalized with DNA capture probes A (black) and B (red). Dotted lines indicate the addition of 1  $\mu$ M of target DNA probes, A' and B'. Asterisks indicate the time points at which the solution was switched back to pure buffer (no DNA).



## Detection of Single Nucleotide Polymorphisms.

**Table S2.** Sequences for the DNA capture and target sequences (perfectly complementary A' and three SNPs) utilized in the single-plexed SNP assay (as seen in Figure 2). Highlighted bases in the target probes indicate the presence of a SNP.

| Strand         | Sequence                                                                                     |
|----------------|----------------------------------------------------------------------------------------------|
| A              | 5'-NH <sub>2</sub> – (CH <sub>2</sub> ) <sub>12</sub> – GGTAGTACAGCATATTGGAAAGTGTATAAGATT-3' |
| A'             | 3'-TTTCACATATTCTAA-5'                                                                        |
| A' SNP: T to A | 3'-TTTCACA <u>A</u> ATTCTAA-5'                                                               |
| A' SNP: T to C | 3'-TTTCACA <u>C</u> ATTCTAA-5'                                                               |
| A' SNP: T to G | 3'-TTTCACA <u>G</u> ATTCTAA-5'                                                               |

## Multiplexed Detection and Identification of Single Nucleotide Polymorphisms.

**Table S3.** Sequences for low G-C Content DNA probes (used in Figure 3, Figure 4, Figure S6, and Figure S8). X and Y = A, T, C, or G.

| Strand        | Sequence                                                                                              |
|---------------|-------------------------------------------------------------------------------------------------------|
| Capture Probe | 5'-NH <sub>2</sub> – (CH <sub>2</sub> ) <sub>12</sub> – GGTAGTACAGCATATTGGAAAGTGT <u>X</u> TAAGAAT-3' |
| Target Probe  | 3'-TTTCACAY <u>Y</u> ATTCTAA-5'                                                                       |

**Table S4.** Sequences for high G-C Content DNA probes (used in Figure S7 and Figure S10). X and Y = A, T, C, or G.

| Strand        | Sequence                                                                                              |
|---------------|-------------------------------------------------------------------------------------------------------|
| Capture Probe | 5'-NH <sub>2</sub> – (CH <sub>2</sub> ) <sub>12</sub> – ATTAAAAAATAATTATAGCTTGATG <u>X</u> TCTGTTG-3' |
| Target Probe  | 3'-GAACTAC <u>Y</u> AGACAAC-5'                                                                        |

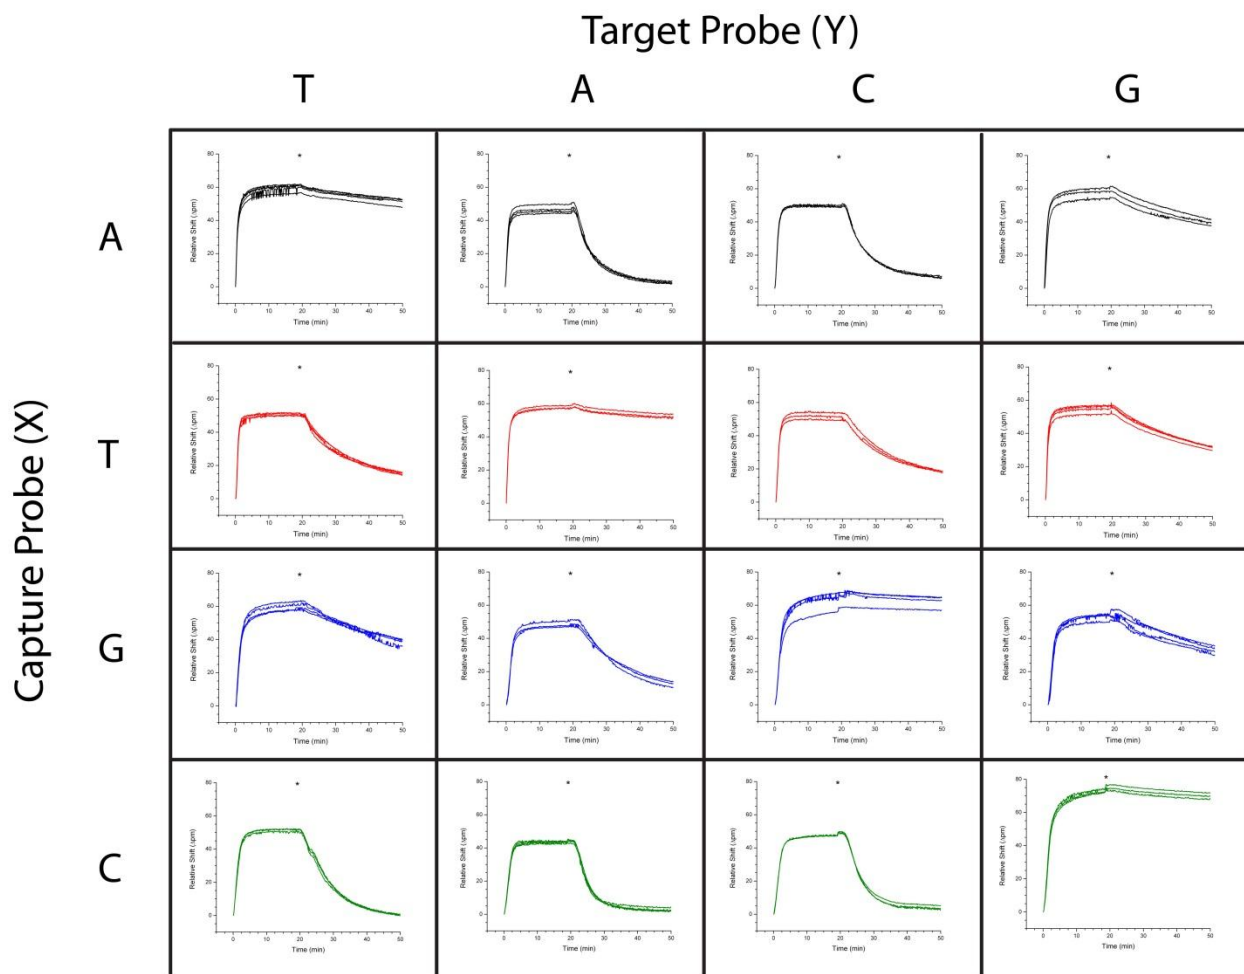

**Figure S6.** Multiplexed SNP assay containing the hybridization and desorption responses (non-normalized) for each of the low G-C content DNA probes (described in Table S3). While it is difficult to distinguish the perfectly complementary and SNP mismatch pairs based on their hybridization response, the clear difference in desorption responses allows for identification of the target. The perfectly complementary duplexes, seen along the diagonal from the top left-to-bottom right, have the lowest desorption rates in their respective columns.

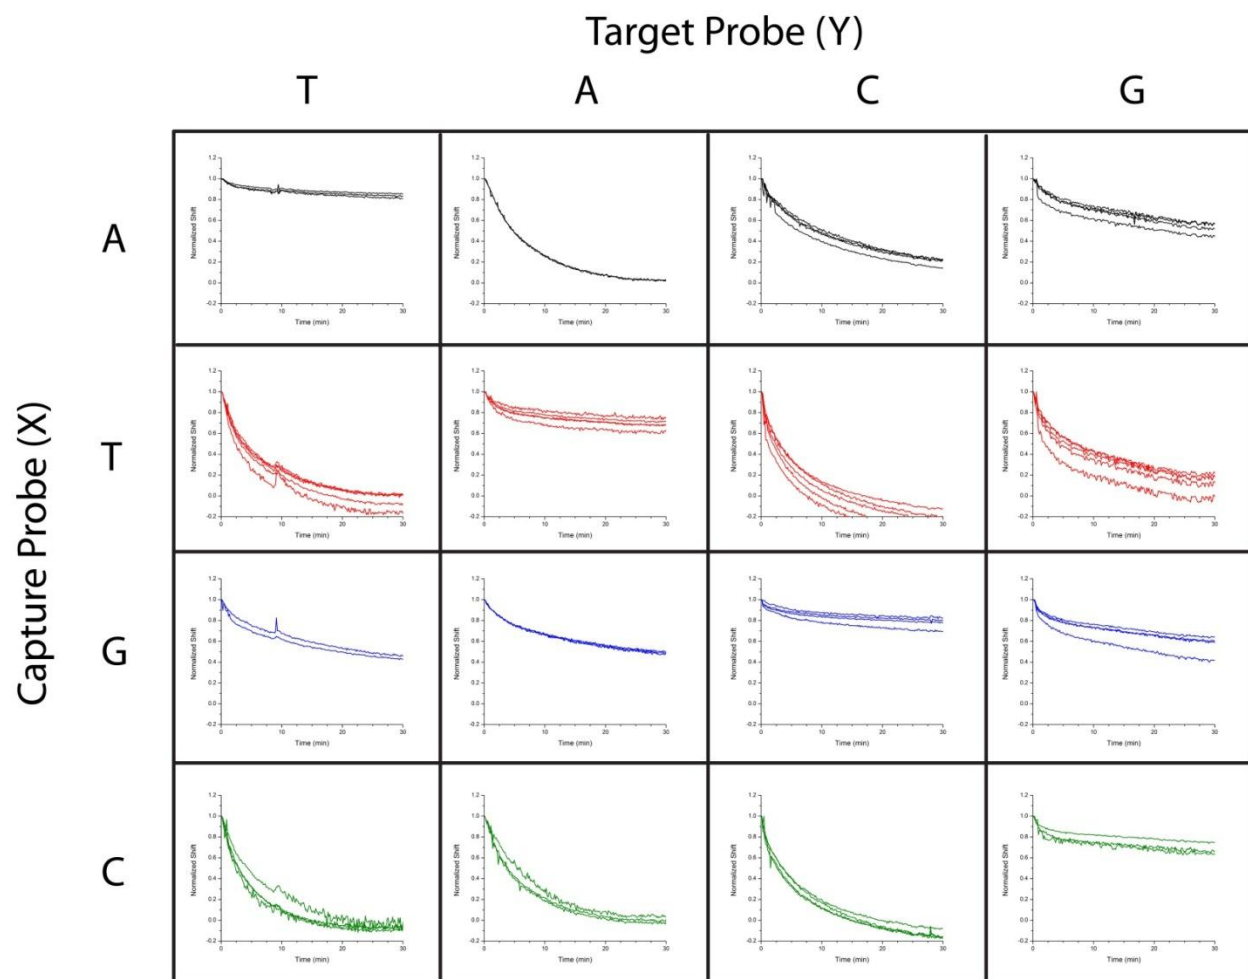

**Figure S7.** Normalized desorption response for each of the possible high G-C capture and target probe combinations in the multiplexed SNP assay (described in Table S4). In all cases, the desorption rate is slowest for the perfectly complementary duplexes, as observed from the top left-to-bottom right diagonal.

## Determination of DNA Melting Temperatures.

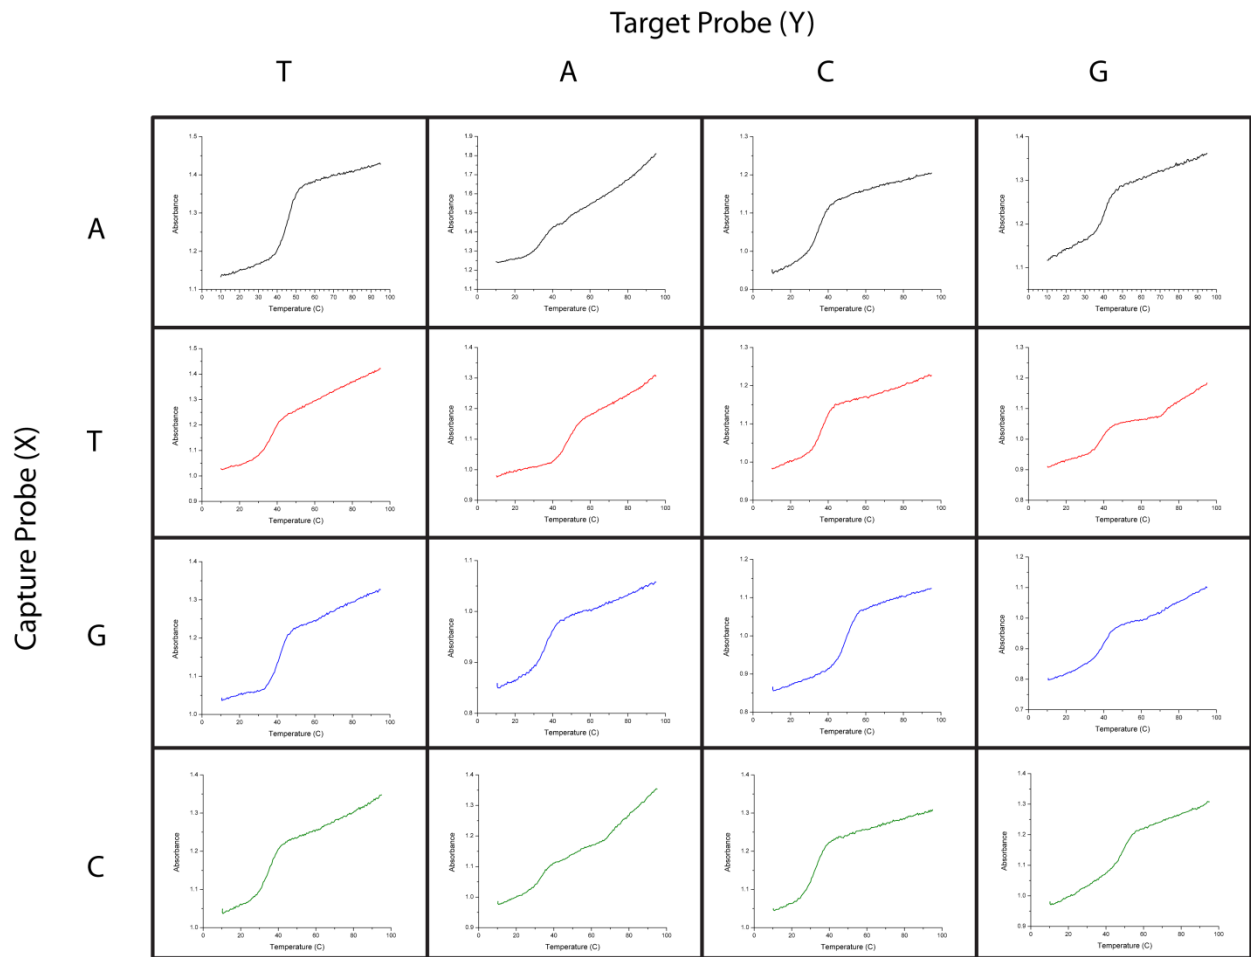

**Figure S8.** Temperature vs. absorbance curves for each of the low G-C content capture and target probe combinations (listed in Table S3).

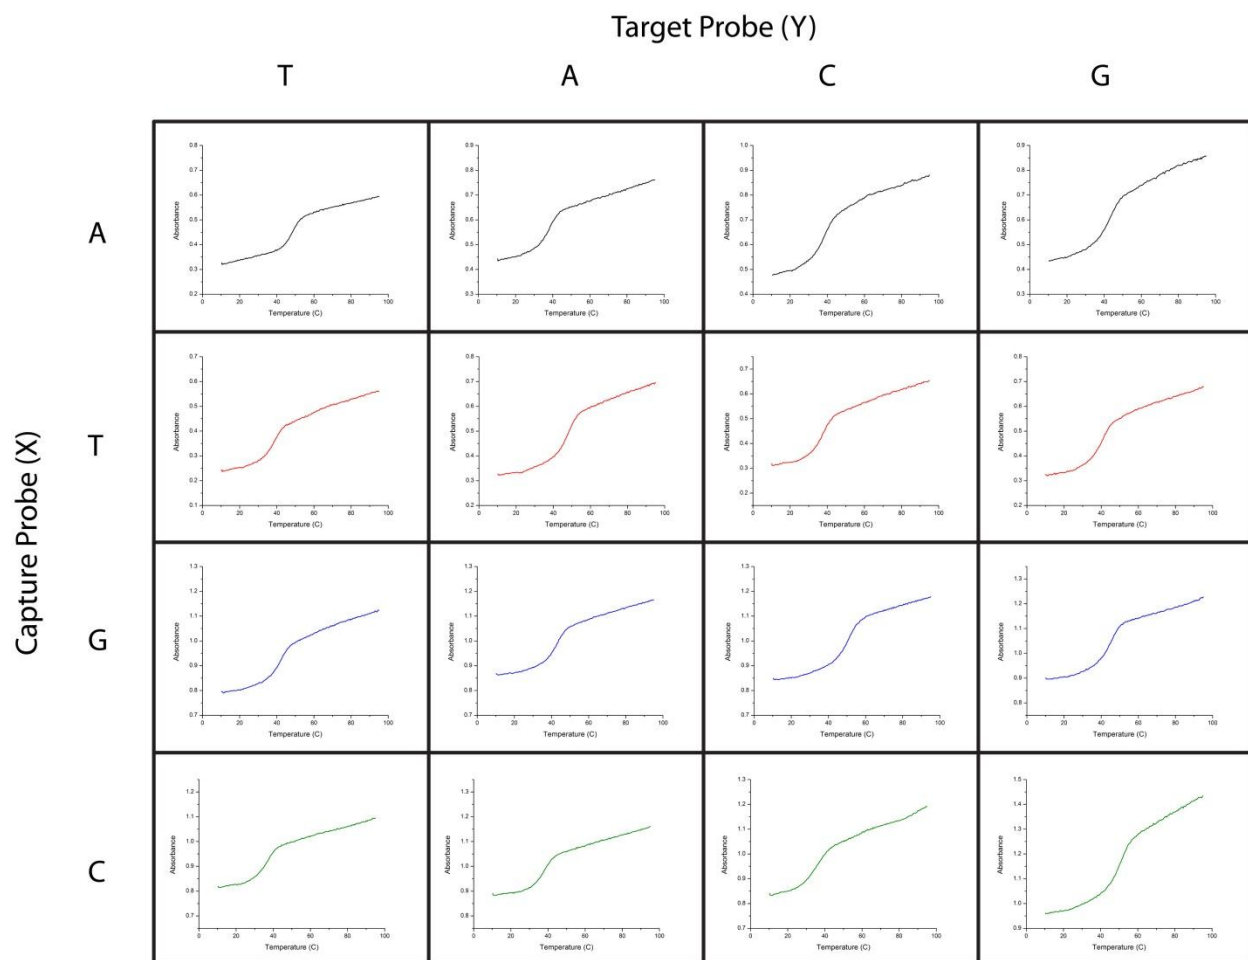

**Figure S9.** Temperature vs. absorbance curves for each of the high G-C content capture and target probe combinations (listed in Table S4).

## Detection of SNP Heterozygotes.

Target Probe (Y)

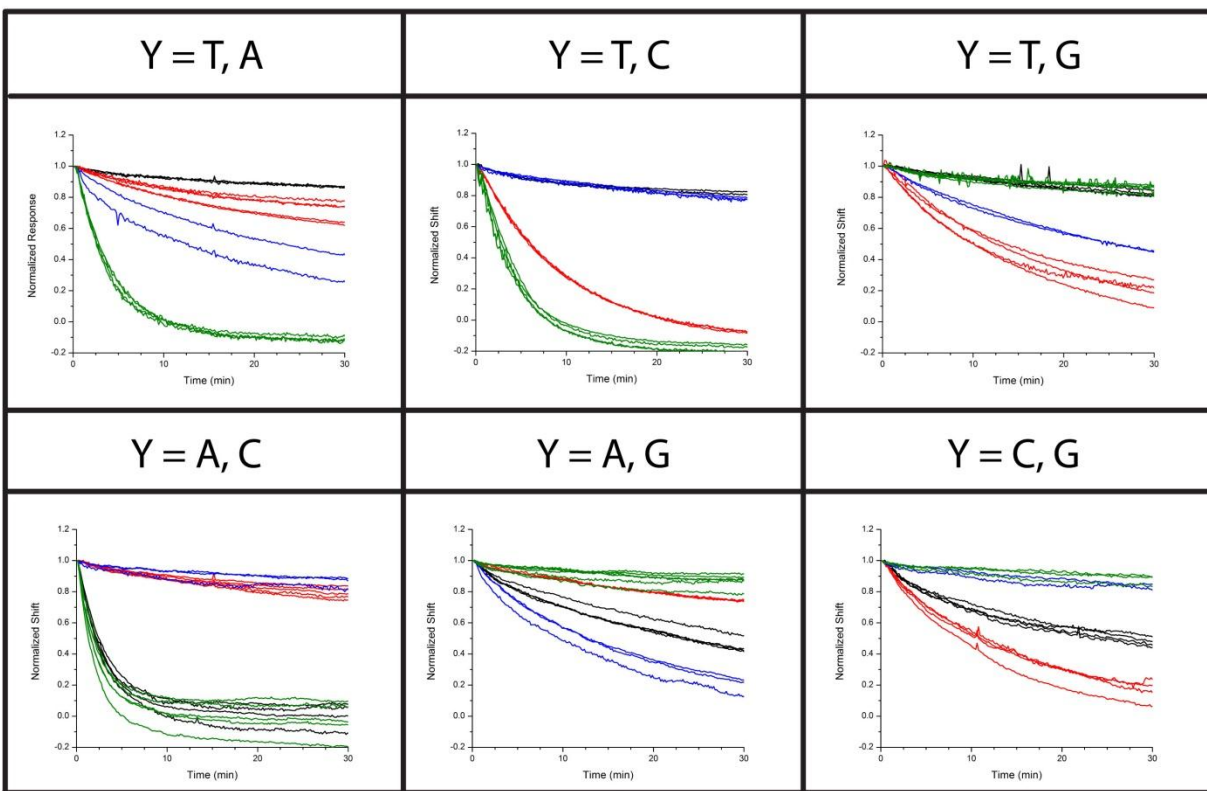

**Figure S10.** Normalized desorption response for each combination of target probes simulating a SNP heterozygote. The capture and targets probes are the same as those utilized in the low G-C content experiments (described in Table S3). The identity of the capture probe in each of the insets above is as follows: X = A (black), X = T (red), X = G (blue), and X = C (green). In each case, the two perfectly complementary target and capture probe combinations show the two lowest desorption rate in each of the plots.

## Data Processing.

**Table S5.** Desorption Rates and Melting Temperature for A' (perfect complement) and three SNPs to the ssDNA capture probe A (shown in Figure 2).

| <b>Target Sequence</b>  | <b>Desorption Rate (s<sup>-1</sup>)</b> | <b>Standard Deviation (s<sup>-1</sup>)</b> | <b>n</b> | <b>Desorption Rate Relative to A'</b> | <b>Melting Temperature (°C)</b> |
|-------------------------|-----------------------------------------|--------------------------------------------|----------|---------------------------------------|---------------------------------|
| A' (perfect complement) | 8.0901 x 10 <sup>-5</sup>               | 3.924 x 10 <sup>-6</sup>                   | 5        | 1.00                                  | 45.65                           |
| A' SNP: T to A          | 2.3225 x 10 <sup>-3</sup>               | 2.766 x 10 <sup>-4</sup>                   | 4        | 28.71                                 | 32.51                           |
| A' SNP: T to C          | 1.4733 x 10 <sup>-3</sup>               | 6.51 x 10 <sup>-5</sup>                    | 3        | 18.21                                 | 35.09                           |
| A' SNP: T to G          | 2.1130 x 10 <sup>-4</sup>               | 9.14 x 10 <sup>-6</sup>                    | 3        | 2.61                                  | 40.90                           |



**Table S6.** Parameters used in fitting a 1:1 kinetic Langmuir Binding Isotherm from experiments used in generating the calibration curve for DNA detection (seen in Figure 1).

| Concentration (nM) | A (pm)  | B (min <sup>-1</sup> ) | t <sub>0</sub> (min) | AB (pm/min) | R <sup>2</sup> | χ <sup>2</sup> |
|--------------------|---------|------------------------|----------------------|-------------|----------------|----------------|
| <b>1000</b>        | 23.2179 | 0.0117                 | 0.2938               | 16.2293     | 0.9550         | 2.5920         |
|                    | 22.1725 | 0.0161                 | 0.2019               | 21.3521     | 0.9744         | 1.2027         |
|                    | 24.9700 | 0.0127                 | 0.2486               | 19.0870     | 0.9704         | 1.8645         |
|                    | 23.0623 | 0.0142                 | 0.2397               | 19.6491     | 0.9626         | 2.0316         |
|                    | 23.9485 | 0.0140                 | 0.2191               | 20.0736     | 0.9693         | 1.7264         |
|                    | 23.5724 | 0.0144                 | 0.2194               | 20.3524     | 0.9729         | 1.4762         |
|                    | 24.6268 | 0.0172                 | 0.1866               | 25.3410     | 0.9753         | 1.3862         |
|                    | 22.7337 | 0.0164                 | 0.1978               | 22.3290     | 0.9721         | 1.3685         |
|                    | 21.6393 | 0.0170                 | 0.1935               | 22.0591     | 0.9733         | 1.1774         |
| <b>500</b>         | 35.1112 | 0.0076                 | 0.3846               | 16.0528     | 0.9150         | 10.3994        |
|                    | 30.2040 | 0.0050                 | 0.3465               | 8.9706      | 0.9622         | 2.2036         |
|                    | 29.8253 | 0.0055                 | 0.3478               | 9.8066      | 0.9630         | 2.3126         |
|                    | 28.5734 | 0.0061                 | 0.2847               | 10.4922     | 0.9662         | 2.0348         |
|                    | 27.6611 | 0.0061                 | 0.3265               | 10.0908     | 0.9624         | 2.1851         |
|                    | 9.4990  | 0.0210                 | 0.2877               | 11.9459     | 0.1883         | 38.5315        |
|                    | 23.9500 | 0.0060                 | 0.3221               | 8.6220      | 0.9614         | 1.6613         |
|                    | 27.3758 | 0.0063                 | 0.3525               | 10.3316     | 0.9595         | 2.4211         |
|                    | 20.1431 | 0.0063                 | 0.3672               | 7.6503      | 0.9592         | 1.3431         |
|                    | 20.2007 | 0.0072                 | 0.3036               | 8.6903      | 0.9619         | 1.3128         |
| <b>250</b>         | 21.4016 | 0.0031                 | 0.2794               | 3.9422      | 0.9931         | 0.1995         |
|                    | 24.4589 | 0.0042                 | 0.2869               | 6.1783      | 0.9920         | 0.3615         |
|                    | 21.0796 | 0.0032                 | 0.3396               | 4.0093      | 0.9830         | 0.5038         |
|                    | 25.3695 | 0.0033                 | 0.2722               | 5.0688      | 0.9955         | 0.1906         |
|                    | 27.1243 | 0.0034                 | 0.3391               | 5.5659      | 0.9936         | 0.3247         |
|                    | 22.9953 | 0.0041                 | 0.2187               | 5.6430      | 0.9853         | 0.5649         |
|                    | 23.2678 | 0.0038                 | 0.1875               | 5.3051      | 0.9832         | 0.6318         |
|                    | 20.5398 | 0.0037                 | 0.1498               | 4.5105      | 0.9898         | 0.2859         |
| <b>125</b>         | 30.4027 | 0.0018                 | 0.4528               | 3.2105      | 0.9782         | 0.8067         |
|                    | 29.8156 | 0.0020                 | 0.3039               | 3.5779      | 0.9842         | 0.6260         |
|                    | 36.0050 | 0.0018                 | 0.2909               | 3.7805      | 0.9825         | 0.8689         |
|                    | 26.5448 | 0.0024                 | 0.3326               | 3.8065      | 0.9830         | 0.6370         |
|                    | 22.3475 | 0.0026                 | 0.2758               | 3.4192      | 0.9861         | 0.3852         |

**Table S7.** Parameters used in linear fits for time resolved hybridization data from experiments used in generating the calibration curve for DNA detection (seen in Figure 1).

| <b>Concentration (nM)</b> | <b>Slope (pm/min)</b> | <b>Slope Error (pm/min)</b> | <b>Intercept (pm)</b> | <b>Intercept Error (pm)</b> | <b>R<sup>2</sup></b> |
|---------------------------|-----------------------|-----------------------------|-----------------------|-----------------------------|----------------------|
| <b>62.5</b>               | 0.7074                | 0.0078                      | 0.2764                | 0.0450                      | 0.9873               |
|                           | 0.6438                | 0.0083                      | -0.3764               | 0.0477                      | 0.9829               |
|                           | 0.5472                | 0.0069                      | -0.1487               | 0.0400                      | 0.9833               |
|                           | 0.7194                | 0.0129                      | -0.3512               | 0.0748                      | 0.9668               |
|                           | 0.6030                | 0.0092                      | -0.0949               | 0.0530                      | 0.9761               |
|                           | 0.6138                | 0.0105                      | -0.2690               | 0.0609                      | 0.9697               |
|                           | 0.7260                | 0.0063                      | -0.2625               | 0.0362                      | 0.9922               |
|                           | 0.7944                | 0.0073                      | -0.0999               | 0.0423                      | 0.9911               |
|                           | 0.7794                | 0.0076                      | -0.4657               | 0.0441                      | 0.9899               |
|                           | 0.5232                | 0.0069                      | -0.1767               | 0.0397                      | 0.9821               |
| 0.5874                    | 0.0070                | -0.6068                     | 0.0406                | 0.9851                      |                      |
| <b>31.3</b>               | 0.1692                | 0.0058                      | 0.0503                | 0.0335                      | 0.8894               |
|                           | 0.1848                | 0.0061                      | 0.1070                | 0.0353                      | 0.8963               |
|                           | 0.3720                | 0.0088                      | -0.1940               | 0.0510                      | 0.9436               |
|                           | 0.2202                | 0.0090                      | 0.2629                | 0.0525                      | 0.8469               |
|                           | 0.4818                | 0.0091                      | -0.3665               | 0.0528                      | 0.9633               |
|                           | 0.3744                | 0.0085                      | -0.0463               | 0.0496                      | 0.9472               |
|                           | 0.2214                | 0.0052                      | -0.0749               | 0.0299                      | 0.9451               |
|                           | 0.1998                | 0.0114                      | -0.4766               | 0.0663                      | 0.7399               |
|                           | 0.1692                | 0.0038                      | -0.2047               | 0.0222                      | 0.8443               |
| <b>15.6</b>               | 0.1272                | 0.0074                      | 0.7174                | 0.0430                      | 0.7374               |
|                           | 0.2766                | 0.0097                      | 1.3964                | 0.0568                      | 0.8838               |
|                           | 0.2874                | 0.0083                      | 0.7696                | 0.0485                      | 0.9187               |
|                           | 0.1350                | 0.0101                      | 1.4250                | 0.0589                      | 0.6264               |
|                           | 0.1524                | 0.0082                      | 0.7544                | 0.0481                      | 0.7626               |
|                           | 0.2484                | 0.0080                      | 0.0174                | 0.0465                      | 0.9015               |
|                           | 0.1212                | 0.0054                      | 0.6109                | 0.0318                      | 0.8225               |
|                           | 0.1302                | 0.0078                      | 0.7056                | 0.0455                      | 0.7240               |
|                           | 0.1614                | 0.0062                      | 1.0438                | 0.0361                      | 0.8650               |
|                           | 0.1092                | 0.0062                      | 0.3297                | 0.0363                      | 0.7431               |
| 0.1116                    | 0.0054                | 0.2704                      | 0.0317                | 0.7980                      |                      |
| <b>3.91</b>               | 0.1056                | 0.0050                      | 0.0125                | 0.0289                      | 0.8081               |
|                           | 0.1290                | 0.0059                      | 0.1598                | 0.0341                      | 0.8181               |
|                           | 0.1314                | 0.0079                      | -0.0096               | 0.0458                      | 0.7211               |
|                           | 0.1092                | 0.0050                      | 0.0502                | 0.0290                      | 0.8165               |
|                           | 0.0487                | 0.0082                      | 0.0478                | 0.0477                      | 0.2417               |
|                           | 0.1770                | 0.0066                      | 0.0157                | 0.0382                      | 0.8710               |
|                           | 0.1200                | 0.0062                      | 0.1171                | 0.0361                      | 0.7768               |

|             |         |        |         |        |         |
|-------------|---------|--------|---------|--------|---------|
|             | 0.1062  | 0.0058 | 0.1918  | 0.0337 | 0.7567  |
| <b>1.95</b> | 0.0978  | 0.0069 | -0.0149 | 0.0401 | 0.6493  |
|             | 0.0918  | 0.0063 | 0.0353  | 0.0367 | 0.6615  |
|             | 0.0852  | 0.0067 | -0.0555 | 0.0387 | 0.6008  |
|             | 0.1056  | 0.0101 | -0.1722 | 0.0587 | 0.5016  |
|             | 0.0930  | 0.0072 | -0.2189 | 0.0419 | 0.6028  |
|             | 0.0870  | 0.0065 | 0.1075  | 0.0379 | 0.6217  |
|             | 0.0750  | 0.0064 | -0.0333 | 0.0372 | 0.5566  |
|             | 0.0972  | 0.0071 | 0.0097  | 0.0410 | 0.6348  |
| <b>0</b>    | 0.0193  | 0.0085 | -0.0822 | 0.0493 | 0.0377  |
|             | 0.0519  | 0.0073 | 0.1256  | 0.0428 | 0.3120  |
|             | 0.0774  | 0.0117 | -0.3728 | 0.0679 | 0.2852  |
|             | -0.0077 | 0.0070 | -0.1437 | 0.0409 | 0.0019  |
|             | -0.0190 | 0.0077 | -0.1949 | 0.0449 | 0.0448  |
|             | 0.0518  | 0.0131 | -0.5543 | 0.0764 | 0.1191  |
|             | -0.0043 | 0.0055 | -0.2833 | 0.0322 | -0.0036 |

**Table S8.** Summary of Initial Slopes obtained from Tables S6-S7, and used in generating the calibration curve in Figure 1b.

| <b>Concentration (nM)</b> | <b>n</b> | <b>Mean Initial Slope (pm/min)</b> | <b>Standard Deviation of Mean (pm/min)</b> |
|---------------------------|----------|------------------------------------|--------------------------------------------|
| 1000                      | 9        | 20.7192                            | 2.5167                                     |
| 500                       | 10       | 10.2653                            | 2.3644                                     |
| 250                       | 8        | 5.0279                             | 0.8066                                     |
| 125                       | 5        | 3.5589                             | 0.2244                                     |
| 62.5                      | 11       | 0.6586                             | 0.0921                                     |
| 31.25                     | 10       | 0.2573                             | 0.1243                                     |
| 15.63                     | 11       | 0.1692                             | 0.0677                                     |
| 3.91                      | 8        | 0.1159                             | 0.0357                                     |
| 1.95                      | 8        | 0.0916                             | 0.0093                                     |
| 0                         | 7        | 0.0242                             | 0.0367                                     |

**Table S9.** Parameters used in fitting the desorption rates for the single-plexed SNP experiment and low G/C content multiplexed SNP experiments (represented in Figure 2 and Figure 3, respectively). Note that the capture probe and target probes used in generating Figure 2 are the same as the capture probe X = A and the four target probes utilized in Figure 3.

| Capture Probe (X) | Target Probe (Y) | A       | Std. Error | $k_d$ (s <sup>-1</sup> ) | Std. Error (s <sup>-1</sup> ) | $\chi^2$              | R <sup>2</sup> |        |
|-------------------|------------------|---------|------------|--------------------------|-------------------------------|-----------------------|----------------|--------|
| A                 | T                | 59.9808 | 0.0374     | $8.0000 \times 10^{-5}$  | $6.25 \times 10^{-7}$         | 0.0690                | 0.9875         |        |
|                   |                  | 59.9044 | 0.0360     | $7.4433 \times 10^{-5}$  | $6.01 \times 10^{-7}$         | 0.0642                | 0.9866         |        |
|                   |                  | 59.2280 | 0.0353     | $8.2614 \times 10^{-5}$  | $5.98 \times 10^{-7}$         | 0.0613                | 0.9892         |        |
|                   |                  | 58.7008 | 0.0452     | $8.3785 \times 10^{-5}$  | $8.89 \times 10^{-7}$         | 0.0860                | 0.9802         |        |
|                   |                  | 55.5113 | 0.0254     | $8.3672 \times 10^{-5}$  | $4.60 \times 10^{-7}$         | 0.0318                | 0.9938         |        |
|                   | A                | 43.3651 | 0.4259     | $2.2100 \times 10^{-3}$  | $3.12 \times 10^{-5}$         | 2.4231                | 0.9787         |        |
|                   |                  | 43.3085 | 0.4161     | $2.0500 \times 10^{-3}$  | $2.84 \times 10^{-5}$         | 2.4792                | 0.9784         |        |
|                   |                  | 45.1291 | 0.3927     | $2.3300 \times 10^{-3}$  | $2.90 \times 10^{-5}$         | 1.9649                | 0.9840         |        |
|                   |                  | 50.3450 | 0.4168     | $2.7000 \times 10^{-3}$  | $3.20 \times 10^{-5}$         | 1.9214                | 0.9869         |        |
|                   | C                | 40.7366 | 0.5213     | $1.4700 \times 10^{-3}$  | $2.82 \times 10^{-5}$         | 5.2014                | 0.9481         |        |
|                   |                  | 41.1077 | 0.5890     | $1.4100 \times 10^{-3}$  | $3.06 \times 10^{-5}$         | 6.8542                | 0.9323         |        |
|                   |                  | 41.7201 | 0.4936     | $1.5400 \times 10^{-3}$  | $2.70 \times 10^{-5}$         | 4.5022                | 0.9574         |        |
|                   | G                | 52.6921 | 0.1210     | $2.0088 \times 10^{-4}$  | $2.42 \times 10^{-6}$         | 0.6421                | 0.9707         |        |
|                   |                  | 56.5411 | 0.1077     | $2.1794 \times 10^{-4}$  | $2.03 \times 10^{-6}$         | 0.5017                | 0.9824         |        |
|                   |                  | 60.0332 | 0.0667     | $2.1508 \times 10^{-4}$  | $1.18 \times 10^{-6}$         | 0.1926                | 0.9938         |        |
|                   | T                | T       | 46.9323    | 0.1917                   | $7.4303 \times 10^{-4}$       | $5.86 \times 10^{-6}$ | 1.0995         | 0.9885 |
|                   |                  |         | 43.5835    | 0.3094                   | $6.6835 \times 10^{-4}$       | $9.74 \times 10^{-6}$ | 3.0169         | 0.9599 |
|                   |                  |         | 42.2102    | 0.2854                   | $6.4301 \times 10^{-4}$       | $9.14 \times 10^{-6}$ | 2.6142         | 0.9620 |
|                   |                  |         | 46.0296    | 0.2212                   | $7.5725 \times 10^{-4}$       | $6.95 \times 10^{-6}$ | 1.4504         | 0.9845 |
| A                 |                  | 58.1095 | 0.0425     | $5.1759 \times 10^{-5}$  | $7.17 \times 10^{-7}$         | 0.0922                | 0.9606         |        |
|                   |                  | 56.1172 | 0.0459     | $5.2053 \times 10^{-5}$  | $8.03 \times 10^{-7}$         | 0.1079                | 0.9516         |        |

|   |   |         |         |                         |                         |                       |        |        |
|---|---|---------|---------|-------------------------|-------------------------|-----------------------|--------|--------|
|   |   | 55.4896 | 0.0678  | $5.0825 \times 10^{-5}$ | $1.20 \times 10^{-6}$   | 0.2349                | 0.8938 |        |
|   | C | 48.6860 | 0.2429  | $6.4053 \times 10^{-4}$ | $6.76 \times 10^{-6}$   | 1.8971                | 0.9788 |        |
|   |   | 44.5147 | 0.2029  | $5.8296 \times 10^{-4}$ | $5.97 \times 10^{-6}$   | 1.3795                | 0.9798 |        |
|   |   | 43.7841 | 0.2518  | $6.0019 \times 10^{-4}$ | $7.61 \times 10^{-6}$   | 2.0980                | 0.9692 |        |
|   | G | 54.9518 | 0.0935  | $3.2841 \times 10^{-4}$ | $1.92 \times 10^{-6}$   | 0.3454                | 0.9931 |        |
|   |   | 52.7017 | 0.1044  | $3.0340 \times 10^{-4}$ | $2.20 \times 10^{-6}$   | 0.4394                | 0.9893 |        |
|   |   | 49.5757 | 0.0915  | $3.0400 \times 10^{-4}$ | $2.06 \times 10^{-6}$   | 0.3378                | 0.9908 |        |
|   |   | 53.5543 | 0.1021  | $3.0722 \times 10^{-4}$ | $2.13 \times 10^{-6}$   | 0.4189                | 0.9903 |        |
|   | G | T       | 60.5901 | 0.0461                  | $2.6405 \times 10^{-4}$ | $8.31 \times 10^{-7}$ | 0.0872 | 0.9980 |
|   |   |         | 56.5829 | 0.1351                  | $2.1486 \times 10^{-4}$ | $2.55 \times 10^{-6}$ | 0.7820 | 0.9720 |
|   |   |         | 62.2761 | 0.1746                  | $3.3760 \times 10^{-4}$ | $3.19 \times 10^{-6}$ | 1.1809 | 0.9825 |
|   |   |         | 58.0323 | 0.1076                  | $2.2639 \times 10^{-4}$ | $1.99 \times 10^{-6}$ | 0.4912 | 0.9844 |
| A |   | 41.5170 | 0.1563  | $7.2476 \times 10^{-4}$ | $5.31 \times 10^{-6}$   | 0.7207                | 0.9901 |        |
|   |   | 45.6663 | 0.2045  | $1.0100 \times 10^{-3}$ | $7.50 \times 10^{-6}$   | 1.0195                | 0.9910 |        |
|   |   | 44.8127 | 0.2302  | $8.5350 \times 10^{-4}$ | $7.83 \times 10^{-6}$   | 1.4330                | 0.9851 |        |
| C |   | 66.1746 | 0.0616  | $3.4314 \times 10^{-5}$ | $9.11 \times 10^{-7}$   | 0.1946                | 0.8712 |        |
|   |   | 67.6445 | 0.0507  | $3.0317 \times 10^{-5}$ | $7.31 \times 10^{-7}$   | 0.1321                | 0.8913 |        |
|   |   | 67.7671 | 0.0343  | $2.8791 \times 10^{-5}$ | $4.94 \times 10^{-7}$   | 0.0606                | 0.9420 |        |
|   |   | 58.6339 | 0.0219  | $1.7525 \times 10^{-5}$ | $3.62 \times 10^{-7}$   | 0.0249                | 0.9180 |        |
| G |   | 47.6778 | 0.1161  | $2.7170 \times 10^{-4}$ | $2.67 \times 10^{-6}$   | 0.5579                | 0.9806 |        |
|   |   | 49.8770 | 0.2039  | $2.6792 \times 10^{-4}$ | $4.48 \times 10^{-6}$   | 1.7256                | 0.9454 |        |
|   |   | 53.0895 | 0.0708  | $2.3703 \times 10^{-4}$ | $1.44 \times 10^{-6}$   | 0.2130                | 0.9926 |        |
|   |   | 55.7501 | 0.1044  | $3.0160 \times 10^{-4}$ | $2.09 \times 10^{-6}$   | 0.4401                | 0.9903 |        |
| C |   | T       | 54.3834 | 0.2920                  | $2.0600 \times 10^{-3}$ | $1.57 \times 10^{-5}$ | 1.1434 | 0.9943 |
|   |   |         | 53.0226 | 0.3283                  | $2.0900 \times 10^{-3}$ | $1.83 \times 10^{-5}$ | 1.4258 | 0.9926 |
|   |   |         | 52.4628 | 0.1978                  | $2.2100 \times 10^{-3}$ | $1.18 \times 10^{-5}$ | 0.4904 | 0.9973 |

|  |   |         |        |                         |                       |        |        |
|--|---|---------|--------|-------------------------|-----------------------|--------|--------|
|  | A | 45.4177 | 0.4669 | $3.2700 \times 10^{-3}$ | $4.75 \times 10^{-5}$ | 1.8873 | 0.9820 |
|  |   | 44.5762 | 0.6203 | $3.5900 \times 10^{-3}$ | $7.04 \times 10^{-5}$ | 3.0297 | 0.9677 |
|  |   | 42.9259 | 0.5980 | $3.2500 \times 10^{-3}$ | $6.39 \times 10^{-5}$ | 3.1202 | 0.9657 |
|  |   | 43.1804 | 0.9199 | $2.9000 \times 10^{-3}$ | $8.73 \times 10^{-5}$ | 8.3020 | 0.9100 |
|  | C | 48.8279 | 0.7200 | $2.1600 \times 10^{-3}$ | $4.54 \times 10^{-5}$ | 6.8380 | 0.9499 |
|  |   | 53.7713 | 0.5631 | $2.7700 \times 10^{-3}$ | $4.10 \times 10^{-5}$ | 3.2660 | 0.9796 |
|  |   | 52.2116 | 0.5903 | $2.6400 \times 10^{-3}$ | $4.21 \times 10^{-5}$ | 3.7754 | 0.9751 |
|  | G | 72.2300 | 0.0493 | $3.8751 \times 10^{-5}$ | $6.68 \times 10^{-7}$ | 0.1227 | 0.9417 |
|  |   | 73.8707 | 0.0345 | $3.5626 \times 10^{-5}$ | $4.56 \times 10^{-7}$ | 0.0602 | 0.9670 |
|  |   | 76.0808 | 0.0309 | $3.5879 \times 10^{-5}$ | $3.96 \times 10^{-7}$ | 0.0482 | 0.9753 |

**Table S10.** Summary of the desorption rates and melting temperatures the single-plexed SNP experiment and low G/C content multiplexed SNP experiments (represented in Figure 2 and Figure 3, respectively). Note that the capture probe and target probes used in generating Figure 2 are the same as the capture probe X = A and the four target probes utilized in Figure 3.

| Capture (X) | Target (Y) | Average Desorption Rate (s <sup>-1</sup> ) | Standard Deviation (s <sup>-1</sup> ) | n | Melting Temperature (°C) | Desorption Rate Relative to Perfect Complement |
|-------------|------------|--------------------------------------------|---------------------------------------|---|--------------------------|------------------------------------------------|
| A           | T          | 8.0901 x 10 <sup>-5</sup>                  | 3.924 x 10 <sup>-6</sup>              | 5 | 45.649                   | 1.00                                           |
|             | A          | 2.3225 x 10 <sup>-3</sup>                  | 2.766 x 10 <sup>-4</sup>              | 4 | 32.512                   | 28.71                                          |
|             | C          | 1.4733 x 10 <sup>-3</sup>                  | 6.51 x 10 <sup>-5</sup>               | 3 | 35.086                   | 18.21                                          |
|             | G          | 2.1130 x 10 <sup>-4</sup>                  | 9.14 x 10 <sup>-6</sup>               | 3 | 40.904                   | 2.61                                           |
| T           | T          | 7.0291 x 10 <sup>-4</sup>                  | 5.581 x 10 <sup>-5</sup>              | 4 | 35.948                   | 13.63                                          |
|             | A          | 5.1546 x 10 <sup>-5</sup>                  | 6.41 x 10 <sup>-7</sup>               | 3 | 47.107                   | 1.00                                           |
|             | C          | 6.0789 x 10 <sup>-4</sup>                  | 2.955 x 10 <sup>-5</sup>              | 3 | 36.640                   | 11.79                                          |
|             | G          | 3.1076 x 10 <sup>-4</sup>                  | 1.188 x 10 <sup>-5</sup>              | 4 | 39.319                   | 6.02                                           |
| G           | T          | 2.6072 x 10 <sup>-4</sup>                  | 5.539 x 10 <sup>-5</sup>              | 4 | 40.547                   | 9.40                                           |
|             | A          | 8.6275 x 10 <sup>-4</sup>                  | 1.429 x 10 <sup>-4</sup>              | 3 | 36.597                   | 31.10                                          |
|             | C          | 2.7737 x 10 <sup>-5</sup>                  | 7.195 x 10 <sup>-6</sup>              | 4 | 49.050                   | 1.00                                           |
|             | G          | 2.6956 x 10 <sup>-4</sup>                  | 2.641 x 10 <sup>-5</sup>              | 4 | 40.507                   | 9.72                                           |
| C           | T          | 2.1200 x 10 <sup>-3</sup>                  | 7.937 x 10 <sup>-5</sup>              | 3 | 34.724                   | 57.68                                          |
|             | A          | 3.2525 x 10 <sup>-3</sup>                  | 2.819 x 10 <sup>-4</sup>              | 4 | 32.815                   | 88.50                                          |
|             | C          | 2.5233 x 10 <sup>-3</sup>                  | 3.213 x 10 <sup>-4</sup>              | 3 | 32.832                   | 68.66                                          |
|             | G          | 3.6752 x 10 <sup>-5</sup>                  | 1.736 x 10 <sup>-6</sup>              | 3 | 49.001                   | 1.00                                           |



**Table S11.** Parameters used in fitting the desorption rates for the high G/C content multiplexed SNP experiments (shown in Figure S7).

| Capture Probe (X) | Target Probe (Y) | A       | Std. Error | $k_d$ (s <sup>-1</sup> ) | Std. Error (s <sup>-1</sup> ) | $\chi^2$ | R <sup>2</sup> |
|-------------------|------------------|---------|------------|--------------------------|-------------------------------|----------|----------------|
| A                 | T                | 36.5112 | 0.0843     | $6.9985 \times 10^{-5}$  | $2.287 \times 10^{-6}$        | 0.3211   | 0.8280         |
|                   |                  | 45.2542 | 0.0905     | $6.4423 \times 10^{-5}$  | $1.975 \times 10^{-6}$        | 0.3721   | 0.8453         |
|                   |                  | 34.5208 | 0.0812     | $8.5017 \times 10^{-5}$  | $2.347 \times 10^{-6}$        | 0.2944   | 0.8709         |
|                   | A                | 21.6210 | 0.1605     | $2.2800 \times 10^{-3}$  | $2.39 \times 10^{-5}$         | 0.2921   | 0.9903         |
|                   |                  | 23.6992 | 0.1849     | $2.3200 \times 10^{-3}$  | $2.56 \times 10^{-5}$         | 0.3811   | 0.9893         |
|                   |                  | 19.8518 | 0.1652     | $2.4500 \times 10^{-3}$  | $2.87 \times 10^{-5}$         | 0.2881   | 0.9883         |
|                   |                  | 18.6200 | 0.3270     | $3.1900 \times 10^{-3}$  | $7.85 \times 10^{-5}$         | 0.8643   | 0.9621         |
|                   |                  | 16.4281 | 0.7016     | $4.5300 \times 10^{-3}$  | $2.702 \times 10^{-4}$        | 2.7675   | 0.8451         |
|                   | C                | 27.7352 | 0.1425     | $4.0216 \times 10^{-4}$  | $6.04 \times 10^{-6}$         | 0.6967   | 0.9593         |
|                   |                  | 29.8968 | 0.2201     | $4.1647 \times 10^{-4}$  | $8.72 \times 10^{-6}$         | 1.6428   | 0.9231         |
|                   | G                | 25.9344 | 0.4676     | $4.0600 \times 10^{-3}$  | $1.024 \times 10^{-4}$        | 1.3764   | 0.9644         |
|                   |                  | 19.0510 | 0.5036     | $4.2300 \times 10^{-3}$  | $1.566 \times 10^{-4}$        | 1.5281   | 0.9303         |
|                   |                  | 26.3971 | 0.5436     | $4.6400 \times 10^{-3}$  | $1.336 \times 10^{-4}$        | 1.6175   | 0.9558         |
|                   |                  | 29.6171 | 0.4470     | $2.5500 \times 10^{-3}$  | $5.43 \times 10^{-5}$         | 2.0233   | 0.9668         |
| T                 | T                | 31.7730 | 0.1042     | $2.3100 \times 10^{-3}$  | $1.07 \times 10^{-5}$         | 0.1202   | 0.9981         |
|                   |                  | 30.2386 | 0.1017     | $2.2300 \times 10^{-3}$  | $1.06 \times 10^{-5}$         | 0.1183   | 0.9980         |
|                   | A                | 27.9358 | 0.1000     | $1.1670 \times 10^{-4}$  | $3.63 \times 10^{-6}$         | 0.4324   | 0.8416         |
|                   |                  | 29.7215 | 0.1338     | $1.3201 \times 10^{-4}$  | $4.60 \times 10^{-6}$         | 0.7636   | 0.8083         |
|                   |                  | 25.4645 | 0.1281     | $1.5149 \times 10^{-4}$  | $5.19 \times 10^{-6}$         | 0.6889   | 0.813          |
|                   |                  | 24.9246 | 0.1302     | $1.5193 \times 10^{-4}$  | $5.39 \times 10^{-6}$         | 0.7111   | 0.8023         |
|                   |                  | 21.7233 | 0.1674     | $1.9289 \times 10^{-4}$  | $8.12 \times 10^{-6}$         | 1.1354   | 0.7406         |
|                   | C                | 26.0607 | 0.1595     | $3.8309 \times 10^{-4}$  | $7.13 \times 10^{-6}$         | 0.8816   | 0.9384         |

|         |         |         |                         |                         |                         |                       |         |        |
|---------|---------|---------|-------------------------|-------------------------|-------------------------|-----------------------|---------|--------|
|         |         | 30.1670 | 0.1726                  | $3.4969 \times 10^{-4}$ | $6.54 \times 10^{-6}$   | 1.0608                | 0.93735 |        |
|         |         | 28.8019 | 0.1712                  | $3.7037 \times 10^{-4}$ | $6.87 \times 10^{-6}$   | 1.0265                | 0.9384  |        |
|         | G       | 25.9663 | 0.1418                  | $2.6900 \times 10^{-3}$ | $2.06 \times 10^{-5}$   | 0.1908                | 0.9954  |        |
|         | 22.3761 | 0.1935  | $2.9600 \times 10^{-3}$ | $3.59 \times 10^{-5}$   | 0.3225                  | 0.9895                |         |        |
|         | 34.2597 | 0.1742  | $2.1700 \times 10^{-3}$ | $1.56 \times 10^{-5}$   | 0.3576                  | 0.9953                |         |        |
| G       | T       | 28.6028 | 0.2136                  | $8.6646 \times 10^{-4}$ | $1.148 \times 10^{-5}$  | 1.1121                | 0.9721  |        |
|         |         | 31.4324 | 0.2302                  | $9.0151 \times 10^{-4}$ | $1.150 \times 10^{-5}$  | 1.2615                | 0.9745  |        |
|         |         | 28.2684 | 0.1602                  | $8.5385 \times 10^{-4}$ | $8.65 \times 10^{-6}$   | 0.6312                | 0.9837  |        |
|         |         | 32.7684 | 0.3199                  | $1.1000 \times 10^{-3}$ | $1.73 \times 10^{-5}$   | 2.1423                | 0.9648  |        |
|         | A       | 20.5733 | 0.8378                  | $3.9000 \times 10^{-3}$ | $2.225 \times 10^{-4}$  | 4.5556                | 0.8553  |        |
|         |         | 26.8440 | 0.6627                  | $3.4600 \times 10^{-3}$ | $1.199 \times 10^{-4}$  | 3.2271                | 0.9342  |        |
|         |         | 20.1381 | 1.1911                  | $4.7400 \times 10^{-3}$ | $3.914 \times 10^{-4}$  | 7.5126                | 0.7521  |        |
|         |         | 18.2169 | 1.8206                  | $6.0400 \times 10^{-3}$ | $8.393 \times 10^{-4}$  | 13.5905               | 0.4975  |        |
|         |         | 14.2982 | 2.0124                  | $7.8800 \times 10^{-3}$ | $1.5400 \times 10^{-3}$ | 12.4689               | 0.2228  |        |
|         | C       | 38.0782 | 0.1015                  | $8.2129 \times 10^{-5}$ | $2.659 \times 10^{-6}$  | 0.4570                | 0.8315  |        |
|         |         | 37.7280 | 0.0887                  | $8.1424 \times 10^{-5}$ | $2.333 \times 10^{-6}$  | 0.3512                | 0.8626  |        |
|         |         | 23.7650 | 0.0826                  | $1.4477 \times 10^{-4}$ | $3.56 \times 10^{-6}$   | 0.2878                | 0.8952  |        |
|         |         | 35.6760 | 0.0938                  | $8.9138 \times 10^{-5}$ | $2.619 \times 10^{-6}$  | 0.3901                | 0.8564  |        |
|         | G       | 26.2781 | 0.3912                  | $2.8800 \times 10^{-3}$ | $6.02 \times 10^{-5}$   | 1.3614                | 0.9710  |        |
|         |         | 20.2104 | 0.7175                  | $3.8500 \times 10^{-3}$ | $1.914 \times 10^{-4}$  | 3.3889                | 0.8828  |        |
|         |         | 19.9839 | 0.5931                  | $3.3100 \times 10^{-3}$ | $1.380 \times 10^{-4}$  | 2.7059                | 0.9091  |        |
|         |         | 21.8720 | 0.7436                  | $3.8400 \times 10^{-3}$ | $1.827 \times 10^{-4}$  | 3.6522                | 0.8911  |        |
|         | C       | T       | 31.2140                 | 0.1611                  | $2.9894 \times 10^{-4}$ | $4.95 \times 10^{-6}$ | 1.0918  | 0.9417 |
|         |         |         | 31.6105                 | 0.1812                  | $2.5058 \times 10^{-4}$ | $5.33 \times 10^{-6}$ | 1.4474  | 0.9060 |
|         |         |         | 32.2294                 | 0.1513                  | $2.5705 \times 10^{-4}$ | $4.38 \times 10^{-6}$ | 1.0018  | 0.9380 |
| 31.3304 |         |         | 0.2227                  | $3.2632 \times 10^{-4}$ | $6.94 \times 10^{-6}$   | 2.0335                | 0.9075  |        |

|  |   |         |        |                         |                         |        |        |
|--|---|---------|--------|-------------------------|-------------------------|--------|--------|
|  | A | 18.1094 | 0.1812 | $9.5683 \times 10^{-4}$ | $1.520 \times 10^{-5}$  | 0.7978 | 0.9576 |
|  |   | 24.5694 | 0.2769 | $8.3504 \times 10^{-4}$ | $1.571 \times 10^{-5}$  | 2.0418 | 0.9367 |
|  |   | 17.8560 | 0.2268 | $9.4261 \times 10^{-4}$ | $1.910 \times 10^{-5}$  | 1.2630 | 0.9306 |
|  |   | 15.6324 | 0.2030 | $1.2100 \times 10^{-3}$ | $2.35 \times 10^{-5}$   | 0.8368 | 0.9451 |
|  |   | 12.4945 | 0.2381 | $2.6500 \times 10^{-3}$ | $7.1233 \times 10^{-5}$ | 0.5481 | 0.9438 |
|  | C | 29.3149 | 0.1172 | $2.0788 \times 10^{-4}$ | $3.62 \times 10^{-6}$   | 0.6312 | 0.9354 |
|  |   | 30.0669 | 0.1338 | $2.0151 \times 10^{-4}$ | $4.01 \times 10^{-6}$   | 0.8273 | 0.9167 |
|  |   | 15.5254 | 0.1011 | $3.8019 \times 10^{-4}$ | $6.59 \times 10^{-6}$   | 0.3985 | 0.9377 |
|  |   | 29.3023 | 0.1079 | $1.7628 \times 10^{-4}$ | $3.27 \times 10^{-6}$   | 0.5519 | 0.9270 |
|  | G | 31.6423 | 0.0856 | $9.6440 \times 10^{-5}$ | $2.292 \times 10^{-6}$  | 0.3771 | 0.8852 |
|  |   | 20.0153 | 0.0911 | $1.3193 \times 10^{-4}$ | $3.94 \times 10^{-6}$   | 0.4116 | 0.8297 |
|  |   | 23.1016 | 0.1209 | $1.4635 \times 10^{-4}$ | $4.56 \times 10^{-6}$   | 0.7137 | 0.8174 |

**Table S12.** Summary of the desorption rates and melting temperatures for each of the high G/C content probe combinations (Figure S7).

| <b>Capture (X)</b> | <b>Target (Y)</b> | <b>Average Desorption Rate (s<sup>-1</sup>)</b> | <b>Standard Deviation (s<sup>-1</sup>)</b> | <b>n</b> | <b>Melting Temperature (°C)</b> | <b>Desorption Rate Relative to Perfect Complement</b> |
|--------------------|-------------------|-------------------------------------------------|--------------------------------------------|----------|---------------------------------|-------------------------------------------------------|
| A                  | T                 | 7.3142 x 10 <sup>-5</sup>                       | 1.0654 x 10 <sup>-5</sup>                  | 3        | 47.989                          | 1.00                                                  |
|                    | A                 | 2.9540 x 10 <sup>-3</sup>                       | 4.2622 x 10 <sup>-4</sup>                  | 5        | 37.473                          | 40.39                                                 |
|                    | C                 | 4.0931 x 10 <sup>-4</sup>                       | 1.0120 x 10 <sup>-5</sup>                  | 2        | 38.701                          | 5.60                                                  |
|                    | G                 | 3.8700 x 10 <sup>-3</sup>                       | 9.1305 x 10 <sup>-4</sup>                  | 4        | 41.719                          | 52.91                                                 |
| T                  | T                 | 2.2700 x 10 <sup>-3</sup>                       | 5.6569 x 10 <sup>-5</sup>                  | 2        | 37.923                          | 15.23                                                 |
|                    | A                 | 1.4900 x 10 <sup>-4</sup>                       | 2.8607 x 10 <sup>-5</sup>                  | 5        | 45.446                          | 1.00                                                  |
|                    | C                 | 3.6772 x 10 <sup>-4</sup>                       | 1.6857 x 10 <sup>-5</sup>                  | 3        | 36.840                          | 2.47                                                  |
|                    | G                 | 2.6067 x 10 <sup>-3</sup>                       | 4.0154 x 10 <sup>-4</sup>                  | 3        | 39.590                          | 17.49                                                 |
| G                  | T                 | 9.3045 x 10 <sup>-4</sup>                       | 1.1481 x 10 <sup>-4</sup>                  | 4        | 40.937                          | 9.36                                                  |
|                    | A                 | 5.2040 x 10 <sup>-3</sup>                       | 1.7901 x 10 <sup>-3</sup>                  | 5        | 41.542                          | 52.37                                                 |
|                    | C                 | 9.9364 x 10 <sup>-5</sup>                       | 3.0468 x 10 <sup>-5</sup>                  | 4        | 48.928                          | 1.00                                                  |
|                    | G                 | 3.4700 x 10 <sup>-3</sup>                       | 4.6726 x 10 <sup>-4</sup>                  | 4        | 43.435                          | 34.92                                                 |
| C                  | T                 | 2.8322 x 10 <sup>-4</sup>                       | 3.5847 x 10 <sup>-5</sup>                  | 4        | 35.896                          | 2.27                                                  |
|                    | A                 | 1.3189 x 10 <sup>-3</sup>                       | 7.5672 x 10 <sup>-4</sup>                  | 5        | 37.221                          | 10.56                                                 |
|                    | C                 | 2.4146 x 10 <sup>-4</sup>                       | 9.3486 x 10 <sup>-5</sup>                  | 4        | 35.220                          | 1.93                                                  |
|                    | G                 | 1.2491 x 10 <sup>-4</sup>                       | 2.5688 x 10 <sup>-5</sup>                  | 3        | 48.342                          | 1.00                                                  |

**Table S13.** Fitting parameters used in determining the desorption rates for SNPs with heterozygote alleles (seen in Figure S10).

| Capture Probe (X) | Target Probes (Y) | A       | Std. Error | $k_d$ (s <sup>-1</sup> ) | Std. Error (s <sup>-1</sup> ) | $\chi^2$ | R <sup>2</sup> |
|-------------------|-------------------|---------|------------|--------------------------|-------------------------------|----------|----------------|
| A                 | T, A              | 63.9413 | 0.0799     | $7.0754 \times 10^{-5}$  | $1.233 \times 10^{-6}$        | 0.2892   | 0.9441         |
|                   |                   | 53.4259 | 0.0655     | $6.8792 \times 10^{-5}$  | $1.209 \times 10^{-6}$        | 0.1947   | 0.9433         |
|                   |                   | 49.9496 | 0.0604     | $6.9896 \times 10^{-5}$  | $1.194 \times 10^{-6}$        | 0.1656   | 0.9462         |
| T                 | T, A              | 44.1643 | 0.1117     | $1.6038 \times 10^{-4}$  | $2.61 \times 10^{-6}$         | 0.5231   | 0.9509         |
|                   |                   | 56.6922 | 0.1479     | $1.3451 \times 10^{-4}$  | $2.66 \times 10^{-6}$         | 0.9372   | 0.9291         |
|                   |                   | 60.9121 | 0.1470     | $1.7027 \times 10^{-4}$  | $2.50 \times 10^{-6}$         | 0.8979   | 0.9597         |
|                   |                   | 48.6977 | 0.1189     | $2.6579 \times 10^{-4}$  | $2.66 \times 10^{-6}$         | 0.5424   | 0.9811         |
|                   |                   | 43.0696 | 0.1092     | $2.4976 \times 10^{-4}$  | $2.74 \times 10^{-6}$         | 0.4638   | 0.9773         |
|                   |                   | 30.1717 | 0.1661     | $7.5961 \times 10^{-4}$  | $7.93 \times 10^{-6}$         | 0.7293   | 0.9819         |
| G                 | T, A              | 48.4226 | 0.1416     | $4.7571 \times 10^{-4}$  | $3.57 \times 10^{-6}$         | 0.6511   | 0.9898         |
|                   |                   | 52.8133 | 1.3606     | $5.8900 \times 10^{-3}$  | $2.123 \times 10^{-4}$        | 7.9300   | 0.9379         |
| C                 | T, A              | 48.7450 | 1.5777     | $5.3800 \times 10^{-3}$  | $2.440 \times 10^{-4}$        | 11.7338  | 0.9062         |
|                   |                   | 49.9744 | 1.6757     | $5.3100 \times 10^{-3}$  | $2.497 \times 10^{-4}$        | 13.4059  | 0.9001         |
|                   |                   | 50.9883 | 1.7474     | $5.9200 \times 10^{-3}$  | $2.839 \times 10^{-4}$        | 13.0069  | 0.8979         |
|                   |                   | 57.0780 | 0.1329     | $7.4189 \times 10^{-5}$  | $1.866 \times 10^{-6}$        | 0.9782   | 0.8663         |
| A                 | T, C              | 51.0464 | 0.1347     | $8.5330 \times 10^{-5}$  | $2.130 \times 10^{-6}$        | 0.9929   | 0.8680         |
|                   |                   | 55.0719 | 0.8906     | $2.4800 \times 10^{-3}$  | $5.65 \times 10^{-5}$         | 8.3316   | 0.9604         |
| T                 | T, C              | 51.0398 | 0.8500     | $2.5100 \times 10^{-3}$  | $5.89 \times 10^{-5}$         | 7.4890   | 0.9585         |
|                   |                   | 47.3188 | 0.8931     | $2.5000 \times 10^{-3}$  | $6.65 \times 10^{-5}$         | 8.3078   | 0.9481         |
|                   |                   | 52.5767 | 0.0838     | $1.1851 \times 10^{-4}$  | $1.313 \times 10^{-6}$        | 0.3712   | 0.9712         |
| G                 | T, C              | 51.5859 | 0.0614     | $1.1308 \times 10^{-4}$  | $9.8 \times 10^{-7}$          | 0.2000   | 0.9823         |
|                   |                   | 50.2226 | 0.0777     | $1.1919 \times 10^{-4}$  | $1.27 \times 10^{-6}$         | 0.3185   | 0.9732         |

|   |      |         |        |                         |                        |         |        |
|---|------|---------|--------|-------------------------|------------------------|---------|--------|
| C |      | 44.9880 | 2.4379 | $5.6700 \times 10^{-3}$ | $4.292 \times 10^{-4}$ | 26.4151 | 0.7430 |
|   |      | 50.6008 | 2.4961 | $5.8600 \times 10^{-3}$ | $4.041 \times 10^{-4}$ | 26.7102 | 0.7783 |
|   |      | 39.2606 | 2.8259 | $6.6100 \times 10^{-3}$ | $6.628 \times 10^{-4}$ | 30.1786 | 0.6028 |
|   |      | 42.9966 | 3.0527 | $6.2800 \times 10^{-3}$ | $6.218 \times 10^{-4}$ | 37.1735 | 0.6123 |
| A | T, G | 65.3973 | 0.0716 | $1.0899 \times 10^{-4}$ | $1.10 \times 10^{-6}$  | 0.2249  | 0.9806 |
|   |      | 60.0055 | 0.0785 | $1.2014 \times 10^{-4}$ | $1.33 \times 10^{-6}$  | 0.2675  | 0.9770 |
|   |      | 56.5098 | 0.0608 | $1.2027 \times 10^{-4}$ | $1.09 \times 10^{-6}$  | 0.1605  | 0.9844 |
|   |      | 60.8153 | 0.1066 | $9.3088 \times 10^{-5}$ | $1.756 \times 10^{-6}$ | 0.5060  | 0.9357 |
| T |      | 50.8062 | 0.1886 | $7.6235 \times 10^{-4}$ | $5.38 \times 10^{-6}$  | 0.9417  | 0.9918 |
|   |      | 43.4829 | 0.2937 | $9.6073 \times 10^{-4}$ | $1.101 \times 10^{-5}$ | 1.9980  | 0.9796 |
|   |      | 50.0208 | 0.0792 | $9.5830 \times 10^{-4}$ | $2.58 \times 10^{-6}$  | 0.1454  | 0.9989 |
|   |      | 48.5170 | 0.1079 | $1.2100 \times 10^{-3}$ | $4.2 \times 10^{-6}$   | 0.2301  | 0.9984 |
| G |      | 48.7209 | 0.1185 | $4.4762 \times 10^{-4}$ | $2.93 \times 10^{-6}$  | 0.4671  | 0.9922 |
|   |      | 49.5111 | 0.0521 | $4.4952 \times 10^{-4}$ | $1.27 \times 10^{-6}$  | 0.0903  | 0.9986 |
|   |      | 52.3797 | 0.1326 | $4.7920 \times 10^{-4}$ | $3.11 \times 10^{-6}$  | 0.5716  | 0.9926 |
| C |      | 53.0998 | 0.0917 | $1.0880 \times 10^{-4}$ | $1.74 \times 10^{-6}$  | 0.3688  | 0.9526 |
|   |      | 40.5070 | 0.0785 | $7.1142 \times 10^{-5}$ | $1.921 \times 10^{-6}$ | 0.2798  | 0.8756 |
|   |      | 56.0100 | 0.0893 | $6.5975 \times 10^{-5}$ | $1.576 \times 10^{-6}$ | 0.3635  | 0.9001 |
|   |      | 60.3927 | 0.1142 | $6.9447 \times 10^{-5}$ | $1.871 \times 10^{-6}$ | 0.5920  | 0.8764 |
|   |      | 58.8434 | 0.1964 | $7.5454 \times 10^{-5}$ | $3.313 \times 10^{-6}$ | 1.7423  | 0.7277 |
| A | A, C | 46.8757 | 1.4708 | $6.4000 \times 10^{-3}$ | $2.829 \times 10^{-4}$ | 8.7061  | 0.9128 |
|   |      | 42.5288 | 0.7429 | $4.3800 \times 10^{-3}$ | $1.082 \times 10^{-4}$ | 3.2880  | 0.9555 |
|   |      | 39.3734 | 0.8932 | $3.7700 \times 10^{-3}$ | $1.211 \times 10^{-4}$ | 5.5448  | 0.9163 |
|   |      | 45.3326 | 0.2811 | $5.1800 \times 10^{-3}$ | $4.53 \times 10^{-5}$  | 0.3963  | 0.9952 |
| T |      | 46.1079 | 0.0832 | $1.1892 \times 10^{-4}$ | $1.83 \times 10^{-6}$  | 0.3007  | 0.9565 |
|   |      | 55.3489 | 0.0908 | $9.2757 \times 10^{-5}$ | $1.639 \times 10^{-6}$ | 0.3663  | 0.9431 |

|   |      |         |        |                         |                        |         |        |
|---|------|---------|--------|-------------------------|------------------------|---------|--------|
|   |      | 62.2493 | 0.1092 | $1.1030 \times 10^{-4}$ | $1.77 \times 10^{-6}$  | 0.5219  | 0.9527 |
|   |      | 52.2946 | 0.0741 | $1.6003 \times 10^{-4}$ | $1.46 \times 10^{-6}$  | 0.2303  | 0.9842 |
|   |      | 47.0549 | 0.0879 | $1.4756 \times 10^{-4}$ | $1.92 \times 10^{-6}$  | 0.3272  | 0.9686 |
| G |      | 29.2136 | 0.0844 | $9.0766 \times 10^{-5}$ | $2.885 \times 10^{-6}$ | 0.3173  | 0.8358 |
|   |      | 50.2907 | 0.0577 | $6.0684 \times 10^{-5}$ | $1.129 \times 10^{-6}$ | 0.1522  | 0.9374 |
|   |      | 48.7898 | 0.0517 | $5.9871 \times 10^{-5}$ | $1.042 \times 10^{-6}$ | 0.1221  | 0.9449 |
| C |      | 36.1094 | 2.9464 | $1.1220 \times 10^{-2}$ | $1.280 \times 10^{-3}$ | 19.3269 | 0.5838 |
|   |      | 23.1046 | 0.8353 | $3.8800 \times 10^{-3}$ | $1.988 \times 10^{-4}$ | 4.7003  | 0.7729 |
|   |      | 37.7423 | 0.3068 | $7.2400 \times 10^{-3}$ | $8.28 \times 10^{-5}$  | 0.3333  | 0.9930 |
|   |      | 34.5882 | 0.6143 | $7.2300 \times 10^{-3}$ | $1.804 \times 10^{-4}$ | 1.3389  | 0.9691 |
|   |      | 28.4739 | 0.7676 | $4.9000 \times 10^{-3}$ | $1.865 \times 10^{-4}$ | 3.1294  | 0.8905 |
| A | A, G | 46.8060 | 0.1135 | $4.7501 \times 10^{-4}$ | $2.96 \times 10^{-6}$  | 0.4211  | 0.9929 |
|   |      | 43.8659 | 0.0910 | $3.4670 \times 10^{-4}$ | $2.36 \times 10^{-6}$  | 0.2986  | 0.9914 |
|   |      | 34.1311 | 0.1068 | $4.4851 \times 10^{-4}$ | $3.77 \times 10^{-6}$  | 0.3806  | 0.9871 |
|   |      | 40.7340 | 0.1092 | $4.5968 \times 10^{-4}$ | $3.25 \times 10^{-6}$  | 0.3944  | 0.9909 |
| T |      | 43.8045 | 0.0581 | $1.5629 \times 10^{-4}$ | $1.37 \times 10^{-6}$  | 0.1424  | 0.9854 |
|   |      | 46.5544 | 0.0571 | $1.6229 \times 10^{-4}$ | $1.27 \times 10^{-6}$  | 0.1370  | 0.9883 |
|   |      | 51.7000 | 0.0733 | $1.6764 \times 10^{-4}$ | $1.47 \times 10^{-6}$  | 0.2248  | 0.9853 |
| G |      | 26.7882 | 0.0967 | $1.0800 \times 10^{-3}$ | $6.3 \times 10^{-6}$   | 0.2014  | 0.9951 |
|   |      | 38.9356 | 0.0814 | $8.6504 \times 10^{-4}$ | $3.21 \times 10^{-6}$  | 0.1642  | 0.9978 |
|   |      | 39.0394 | 0.1183 | $8.1733 \times 10^{-4}$ | $4.52 \times 10^{-6}$  | 0.3581  | 0.9950 |
| C |      | 31.5048 | 0.0831 | $1.2158 \times 10^{-4}$ | $2.67 \times 10^{-6}$  | 0.3002  | 0.9134 |
|   |      | 50.5194 | 0.0630 | $6.6492 \times 10^{-5}$ | $1.230 \times 10^{-6}$ | 0.1809  | 0.9374 |
|   |      | 33.8945 | 0.0411 | $4.1477 \times 10^{-5}$ | $1.182 \times 10^{-6}$ | 0.0787  | 0.8631 |
|   |      | 44.3445 | 0.1151 | $6.1320 \times 10^{-5}$ | $2.556 \times 10^{-6}$ | 0.6076  | 0.7450 |
|   |      | 45.1732 | 0.0450 | $5.4971 \times 10^{-5}$ | $9.77 \times 10^{-7}$  | 0.0931  | 0.9421 |

|   |      |         |        |                         |                        |        |        |
|---|------|---------|--------|-------------------------|------------------------|--------|--------|
|   |      | 42.1808 | 0.0519 | $7.2191 \times 10^{-5}$ | $1.218 \times 10^{-6}$ | 0.1224 | 0.9476 |
| A | C, G | 54.4163 | 0.2599 | $3.6747 \times 10^{-4}$ | $5.51 \times 10^{-6}$  | 2.3631 | 0.9594 |
|   |      | 44.3384 | 0.2528 | $3.8975 \times 10^{-4}$ | $6.66 \times 10^{-6}$  | 2.1969 | 0.9479 |
|   |      | 44.5219 | 0.2152 | $4.1516 \times 10^{-4}$ | $5.72 \times 10^{-6}$  | 1.5611 | 0.9658 |
|   |      | 43.1168 | 0.2415 | $4.4798 \times 10^{-4}$ | $6.75 \times 10^{-6}$  | 1.9168 | 0.9595 |
| T |      | 47.1016 | 0.1899 | $9.5673 \times 10^{-4}$ | $6.55 \times 10^{-6}$  | 0.8278 | 0.9930 |
|   |      | 54.5349 | 0.1672 | $9.8071 \times 10^{-4}$ | $5.05 \times 10^{-6}$  | 0.6315 | 0.9960 |
|   |      | 47.2464 | 0.1232 | $1.4200 \times 10^{-3}$ | $5.5 \times 10^{-6}$   | 0.2634 | 0.9982 |
|   |      | 45.2700 | 0.1710 | $9.9526 \times 10^{-4}$ | $6.28 \times 10^{-6}$  | 0.6549 | 0.9942 |
| G |      | 46.1395 | 0.1137 | $9.4366 \times 10^{-5}$ | $2.467 \times 10^{-6}$ | 0.5671 | 0.8834 |
|   |      | 52.6328 | 0.0456 | $8.7428 \times 10^{-5}$ | $8.66 \times 10^{-7}$  | 0.0920 | 0.9816 |
| C |      | 57.8145 | 0.0501 | $4.3575 \times 10^{-5}$ | $8.48 \times 10^{-7}$  | 0.1155 | 0.9325 |
|   |      | 34.8381 | 0.0302 | $5.7019 \times 10^{-5}$ | $8.52 \times 10^{-7}$  | 0.0413 | 0.9591 |
|   |      | 51.3347 | 0.0727 | $8.7245 \times 10^{-5}$ | $1.413 \times 10^{-6}$ | 0.2332 | 0.9522 |



**Table S14.** Summary of the desorption rates for each of the capture and target probe combinations used in profiling SNPs with heterozygote alleles (shown in Figure S10).

| <b>Capture (X)</b> | <b>Targets (Y)</b> | <b>Average Desorption Rate (s<sup>-1</sup>)</b> | <b>Standard Deviation (s<sup>-1</sup>)</b> | <b>n</b> |
|--------------------|--------------------|-------------------------------------------------|--------------------------------------------|----------|
| A                  | T, A               | 6.9814 x 10 <sup>-5</sup>                       | 9.84 x 10 <sup>-7</sup>                    | 3        |
| T                  |                    | 1.9614 x 10 <sup>-4</sup>                       | 5.804 x 10 <sup>-5</sup>                   | 5        |
| G                  |                    | 6.1766 x 10 <sup>-4</sup>                       | 2.0075 x 10 <sup>-4</sup>                  | 2        |
| C                  |                    | 5.6250 x 10 <sup>-3</sup>                       | 3.248 x 10 <sup>-4</sup>                   | 4        |
| A                  | T, C               | 7.9760 x 10 <sup>-5</sup>                       | 7.878 x 10 <sup>-6</sup>                   | 2        |
| T                  |                    | 2.4967 x 10 <sup>-3</sup>                       | 1.53 x 10 <sup>-5</sup>                    | 3        |
| G                  |                    | 1.1693 x 10 <sup>-4</sup>                       | 3.35 x 10 <sup>-6</sup>                    | 3        |
| C                  |                    | 6.1050 x 10 <sup>-3</sup>                       | 4.223 x 10 <sup>-4</sup>                   | 4        |
| A                  | T, G               | 1.1062 x 10 <sup>-4</sup>                       | 1.283 x 10 <sup>-5</sup>                   | 4        |
| T                  |                    | 9.7284 x 10 <sup>-4</sup>                       | 1.8340 x 10 <sup>-4</sup>                  | 4        |
| G                  |                    | 4.5878 x 10 <sup>-4</sup>                       | 1.771 x 10 <sup>-5</sup>                   | 3        |
| C                  |                    | 7.8163 x 10 <sup>-5</sup>                       | 1.7462 x 10 <sup>-5</sup>                  | 5        |
| A                  | A, C               | 4.9325 x 10 <sup>-3</sup>                       | 1.1360 x 10 <sup>-3</sup>                  | 4        |
| T                  |                    | 1.2591 x 10 <sup>-4</sup>                       | 2.750 x 10 <sup>-5</sup>                   | 5        |
| G                  |                    | 7.0441 x 10 <sup>-5</sup>                       | 1.7607 x 10 <sup>-5</sup>                  | 3        |
| C                  |                    | 6.8940 x 10 <sup>-3</sup>                       | 2.8287 x 10 <sup>-3</sup>                  | 5        |
| A                  | A, G               | 4.3248 x 10 <sup>-4</sup>                       | 5.821 x 10 <sup>-5</sup>                   | 4        |
| T                  |                    | 1.6207 x 10 <sup>-4</sup>                       | 5.68 x 10 <sup>-6</sup>                    | 3        |
| G                  |                    | 9.2079 x 10 <sup>-4</sup>                       | 1.56 x 10 <sup>-6</sup>                    | 3        |
| C                  |                    | 6.9672 x 10 <sup>-5</sup>                       | 2.7538 x 10 <sup>-5</sup>                  | 6        |
| A                  | C, G               | 4.0509 x 10 <sup>-4</sup>                       | 3.460 x 10 <sup>-5</sup>                   | 4        |
| T                  |                    | 1.0882 x 10 <sup>-3</sup>                       | 2.218 x 10 <sup>-4</sup>                   | 4        |
| G                  |                    | 9.0897 x 10 <sup>-5</sup>                       | 4.906 x 10 <sup>-6</sup>                   | 2        |
| C                  |                    | 6.2613 x 10 <sup>-5</sup>                       | 2.2366 x 10 <sup>-5</sup>                  | 3        |

## References

1. Washburn, A. L.; Gunn, L. C.; Bailey, R. C. *Anal. Chem.* **2009**, 81, 9499-9506.
2. Iqbal, M.; Gleeson, M. A.; Spaugh, B.; Tybor, F.; Gunn, W. G.; Hochberg, M.; Baehr-Jones, T.; Bailey, R. C.; Gunn, L. C. *J. Sel. Topics Quantum Electron.* **2010**, 16, 654-661.
